# Supplementary material for: Loss of ZNRF3/RNF43 unleashes EGFR in cancer
Source: eLife. 2026 Apr 10;13:RP95639. doi: 10.7554/eLife.95639 (PMC13068435; doi:10.7554/eLife.95639)
Supplement: Figure 2—figure supplement 1—source data 1. [file elife-95639-fig2-figsupp1-data1.xlsx]

## Sheet: Fig 2 S1D
V2	g0	g1	g2	g3
1	1.73898	1.34095	1.76692	1.41762
1	1.461	1.42707	1.55898	1.39241
1	1.44668	1.43683	1.35391	1.56076
