# Supplementary material for: Loss of ZNRF3/RNF43 unleashes EGFR in cancer
Source: eLife. 2026 Apr 10;13:RP95639. doi: 10.7554/eLife.95639 (PMC13068435; doi:10.7554/eLife.95639)
Supplement: Figure 2—source data 1. [file elife-95639-fig2-data1.xlsx]

## Sheet: Fig2A
GFP	RNF43	ZNRF3	CBL
1	0.78991	0.383566	0.631655
1	0.85426	0.47469	0.884167
1	0.634364	0.685632	0.771991

## Sheet: Fig2D
RNF43	WT	KO
	1	0.5
	1	5.48
	1	6.8
	1	4.86154
	1	2.43702

## Sheet: Fig2G
	Vector	WT	F105A/F109A	R65A/Q70A
MEAN	1	1.38016	1.32902	1.02659
SEM	0	0.0670475	0.124977	0.0568905
