# Supplementary material for: Loss of ZNRF3/RNF43 unleashes EGFR in cancer
Source: eLife. 2026 Apr 10;13:RP95639. doi: 10.7554/eLife.95639 (PMC13068435; doi:10.7554/eLife.95639)
Supplement: Figure 3—source data 1. [file elife-95639-fig3-data1.xlsx]

## Sheet: Fig3A
WT	KO
0.69702	2.17097
2.00267	0.3969
1.27156	0.9212
0.47943	1.15628
1.00375	1.44638
0.63087	0.79241

## Sheet: Fig3B
WT	KO
1	0.2212
1	1.18996
1	1.81827

## Sheet: Fig3C
	WT-1	WT-2	WT-3	KO-1	KO-2	KO-3
0	1	1	1	1.32405	1.21027	1.28369
5	0.710011	0.993975	0.911689	1.10732	1.431	1.18628
10	0.846912	0.83792	0.833863	1.31498	1.54471	1.5568
20	0.873593	0.583234	0.784097	1.34812	1.34221	1.15157
