# Supplementary material for: Loss of ZNRF3/RNF43 unleashes EGFR in cancer
Source: eLife. 2026 Apr 10;13:RP95639. doi: 10.7554/eLife.95639 (PMC13068435; doi:10.7554/eLife.95639)
Supplement: Figure 4—figure supplement 1—source data 1. [file elife-95639-fig4-figsupp1-data1.xlsx]

## Sheet: Fig 4 S1A
gene_symbol	iBAQ	log2FC
SNX3	3.4743e+07	2.14711
RAB7A	2.26127e+07	2.34567
UBB	1.07832e+09	3.3408
LIFR	7.6308e+06	3.70339
TGFBR2	8.99259e+06	3.78649
SERBP1	4.71791e+06	4.29403
SDCBP	5.86935e+07	4.43579
ATP6V0A2	1.56857e+06	4.84365
PTPN11	1.98506e+07	4.91028
WASL	1.76248e+07	5.00529
VAMP7	3.22235e+07	5.19321
NCK1	8.07001e+06	5.41029
VAV2	1.01763e+08	5.783
SHC2	3.28722e+07	6.06256
DNM2	1.30787e+07	6.95347
SHC1	4.55431e+08	9.10132
GRB2	7.34878e+08	9.17629
PIK3R2	4.12371e+07	9.5632
RPTOR	31931.3	28.2504
LRRK1	64783.5	29.2711
MAP2K3	85622.3	29.6734
VPS11	88546.4	29.7219
SOS2	102821	29.9375
SNX6	165210	30.6217
MAP2K6	166426	30.6322
ZNRF3	174947	30.7043
GRB7	254051	31.2425
CD2AP	359322	31.7426
ABCA3	370679	31.7875
MVB12A	387747	31.8525
DNM1	6.09631e+06	32.4407
MAP4K5	667411	32.6359
CLDN12	710610	32.7264
VPS28	740470	32.7858
PRKCD	749627	32.8035
STX8	781310	32.8632
PIK3CA	830061	32.9506
VTI1B	2.8749e+06	32.995
EPN1	2.67168e+06	33.0896
SOS1	918170	33.0961
STAT5B	1.05159e+06	33.2919
STAT5A	1.05362e+06	33.2946
ATP6V0D1	2.55666e+06	33.7597
WIPF2	1.85143e+06	34.1079
SH3BP2	1.92356e+06	34.1631
PIK3R3	2.21087e+06	34.3639
LAMTOR1	6.10446e+06	34.5696
PIK3C2B	3.14562e+06	34.8726
VAV3	3.46364e+06	35.0116
SNX17	4.25728e+06	35.3092
CRKL	4.28536e+06	35.3187
PIK3R1	4.92447e+06	35.5192
ERRFI1	5.68622e+06	35.7268
MAP4K3	5.86764e+06	35.7721
UBASH3A	5.97752e+06	35.7988
PIK3CB	8.19428e+06	36.2539
PLCG1	8.8284e+06	36.3614
TNK2	1.6135e+07	37.2314
UBASH3B	4.01308e+07	38.5459
CBLB	4.26067e+07	38.6323
CRK	4.46835e+07	38.7009
CBL	7.10162e+07	39.3694
