# Supplementary material for: Loss of ZNRF3/RNF43 unleashes EGFR in cancer
Source: eLife. 2026 Apr 10;13:RP95639. doi: 10.7554/eLife.95639 (PMC13068435; doi:10.7554/eLife.95639)
Supplement: Figure 5—figure supplement 2—source data 1. [file elife-95639-fig5-figsupp2-data1.xlsx]

## Sheet: Fig 5 S2D
Vector	WT	deltaPA	deltaRING
1	0.36	0.53	1.09
1	0.3	0.41	1.6
1	0.26	0.51	1.61
