# Supplementary material for: Loss of ZNRF3/RNF43 unleashes EGFR in cancer
Source: eLife. 2026 Apr 10;13:RP95639. doi: 10.7554/eLife.95639 (PMC13068435; doi:10.7554/eLife.95639)
Supplement: Figure 6—figure supplement 1—source data 1. [file elife-95639-fig6-figsupp1-data1.xlsx]

## Sheet: Fig 6 S1
	WT1	WT2	WT3	WT4	KO1	KO2	KO3	KO4
p-Akt(T308)_R_V	72.7609	57.8313	103.405	68.3107	161.935	142.94	178.645	144.929
p-p44/42MAPK(Erk1/2)(T202/Y204)_R_V	5770.84	7291.63	7451.82	6767.47	12146.1	9346.15	11375.6	9659.6
p-Stat1(Y701)_R_V	7242.99	7222.62	6566.85	8457.53	11171.8	11130.8	9292.39	10526
p-GSK-3a/b (Ser21/9)_R_V	7791.23	8868.48	8616.89	8098.03	11751.2	11990.3	14165.5	11223
p-Pras40(T246)_R_V	22843.8	25375.2	25922.3	24133.5	41778.6	47665.7	55826.2	46785
