# Supplementary material for: Loss of ZNRF3/RNF43 unleashes EGFR in cancer
Source: eLife. 2026 Apr 10;13:RP95639. doi: 10.7554/eLife.95639 (PMC13068435; doi:10.7554/eLife.95639)
Supplement: Figure 6—figure supplement 2—source data 1. [file elife-95639-fig6-figsupp2-data1.xlsx]

## Sheet: Fig 6 S2
2-DAY RSPO
bactin	Tgfbr1	Tgfbr2	Smad4	Ep300	Bach1
1	0.87	2.06	0.97	0.62	1.07
1	0.47	0.99	0.6	0.83	0.42
1	1.02	0.59	0.73	0.9	1.12
1	0.41	0.39	0.58	0.37	0.27
8-DAY RSPO
bactin	Tgfbr1	Tgfbr2	Smad4	Ep300	Bach1
1	0.92	0.89	0.75	0.88	0.46
1	0.74	1.12	1.43	1.1	0.42
1	3.1	1.59	1.1	1.44	0.79
1	1.27	1.67	1.13	0.63	0.69
1	0.96	1.82	1.21	0.46	0.47
