# Supplementary material for: Loss of ZNRF3/RNF43 unleashes EGFR in cancer
Source: eLife. 2026 Apr 10;13:RP95639. doi: 10.7554/eLife.95639 (PMC13068435; doi:10.7554/eLife.95639)
Supplement: Figure 6—source data 1. [file elife-95639-fig6-data1.xlsx]

## Sheet: Fig6A
	WT			KO
0	3	3	3	3	3	3
3	5	7	7	13	14	13
6	36	28	30	84	88	94

## Sheet: Fig6B
	Axin2		Sox2		Cnnd1
MEAN	1.025	0.971	1	1.489	1	0.356
SEM	0.343	0.385	0.965	1.468	0.575	0.118

## Sheet: Fig6D
RSPO -	RSPO +
80.8421	248.561
115.368	280.912
257.895	376.491
61.4737	108.351
96.5614	58.7368
276.421	58.5263
160.842	596.07
58.5263	288.351
225.474	517.333
371.368	390.807
360.14	401.333
322.947	221.193
275.93	393.614
139.789	163.439
93.614	262.386
205.684	44.6316
158.877	368.211
288.982	206.947
182.386	131.579
212.211	393.333
226.246	391.509
326.947	368.982
136.912	197.754
79.4386	181.263
77.193	352.842
64.4211	193.825
157.193	400.561
181.404	409.544
118.246	308.421
	545.614
	494.175
	230.667
	231.018
	81.8947
	97.3333
	110.035
	224.842
	352.842
	260.351
	306.667
	225.333
	218.737
	294.246
	68.2807
	62.0351
	558.526

## Sheet: Fig6E
RSPO -	RSPO +
7	20
10	11
6	10
6	5
7.25	11.5

## Sheet: Fig6F
RSPO-	RSPO+	RSPO+	RSPO+
1	1.46589	2.18779	2.62632
1	1.40315	1.49303	2.90609

## Sheet: Fig6G
2-DAY RSPO treatment
bactin	Egfr	Lef1	Tcf7l1	Tcf7l2	Axin2	Myc	Sox2	Cd44
1	0.99	0.42	0.9	0.63	0.57	0.25	0.39	0.48
1	0.59	1.18	0.91	1.13	1.44	1.04	1.04	1.08
1	0.84	1.06	1.16		1.65	0.87	0.89	1.27
1	0.76	0.74	1.01	0.73	0.85	0.97	0.84	0.59
8-DAY RSPO treatment
bactin	Egfr	Lef1	Tcf7l1	Tcf7l2	Axin2	Myc	Sox2	Cd44
1	0.42	0.15	0.24	0.4	0.24	0.21	0.15	0.37
1	1.83	0.26	0.06	0.64	0.44	0.88	0.49	0.62
1	2.22	0.14	0.23	0.15	0.33	0.66	0.28	0.44
1	2.92	0.66	1.23	1.4	0.55	1.23	1.52	0.82
1	2.71	0.61	0.65	1.64	0.65	1.11	1.35	1.96

## Sheet: Fig6H
	GFP		ZNRF3
	Mean	SEM	Mean	SEM
0	5.58826	0.374892	4.65856	0.225468
1	13.5592	0.738925	9.52037	0.464147
2	23.0012	1.15996	15.3137	0.750013
3	39.0109	1.75901	25.1164	1.22268
4	61.2903	2.26205	40.5848	1.76539
5	82.2584	1.95144	49.6846	2.00634
6	89.7593	1.51056	57.6571	2.25301

## Sheet: Fig6K
	WT		KO
Erlotinib	-	+	-	+
MEAN	1	0.89271	1.28999	0.720869
SEM	0.066947	0.0436225	0.070525	0.0416255

## Sheet: Fig6L
MEF	Vehicle					Erlitonib					C59					Erlitonib+C59
WT	1	1	1	1	1	0.8575	0.9257	0.9796	0.9996	0.9498	1	0.998975	1.0067	0.8903	1.0306	0.9775	0.9187	0.9137	0.8097	0.9666
Znrf3 KO	1.5725	1.415	1.128	1.3963	1.4879	1.1775	1.035	0.897	1.2022	1.256	1.5875	1.335	1.13573	1.3597	1.3213	1.1575	1.01	0.890075	1.052	1.2318
