# Supplementary material for: Loss of ZNRF3/RNF43 unleashes EGFR in cancer
Source: eLife. 2026 Apr 10;13:RP95639. doi: 10.7554/eLife.95639 (PMC13068435; doi:10.7554/eLife.95639)
Supplement: Figure 7—figure supplement 1—source data 1. [file elife-95639-fig7-figsupp1-data1.xlsx]

## Sheet: Fig 7 S1A
WT	KO
5	10
10	10
10	15
10	15
10	10
15	20

## Sheet: Fig 7 S1B
WT	KO
5	20
5	20
5	20
5	20
5	20
5	20

## Sheet: Fig 7 S1C
WT	KO
0	10
0	20
0	15
0	20
0	20
0	20

## Sheet: Fig 7 S1D
WT	KO
0	0
0	0
0	0
0	0
0	35
0	40
