# Supplementary material for: Loss of ZNRF3/RNF43 unleashes EGFR in cancer
Source: eLife. 2026 Apr 10;13:RP95639. doi: 10.7554/eLife.95639 (PMC13068435; doi:10.7554/eLife.95639)
Supplement: Figure 7—source data 1. [file elife-95639-fig7-data1.xlsx]

## Sheet: Fig7A
WEEK	GFP-1	GFP-2	GFP-3	GFP-4	GFP-5	GFP-6	GFP-7	ZNRF3-1	ZNRF3-2	ZNRF3-3	ZNRF3-4	ZNRF3-5	ZNRF3-6	ZNRF3-7
0	0.17	3.02	0.72	0.94	1.2	0.25	0.69	2.67	0.52	0.84	1.01	0.66	0.67	0.63
1	127.6	476.25	279.95	74.08	81.7	81.7	184.77	207.56	333.65	90.62	264.33	20.53	16.69	49.61
2		596.67	651.61	479.68	521.67	521.67			527.44	295.41	554.25	259.61	264.08	250.37
3	1305.94	1326.06	1059	1546.89	1112.85	1112.85	1364.68	590.51	351.32	642.31	945.18	536.58	563.39	377.83

## Sheet: Fig7B
P-EGFR		EGFR
GFP	ZNRF3	GFP	ZNRF3
1.0462	0.668113	1.12974	0.551007
0.938628	0.684335	0.987351	0.622414
1.01517	0.381543	0.882909	0.684824

## Sheet: Fig7D
WT	KO
10	40
15	50
15	50
15	55
15	85
20	100
